# Supplementary material for: Carbon nanofiber-assisted molecularly imprinted electrochemical sensors for selective hypoxanthine detection from real samples
Source: Research Square preprint supplement (doi:10.21203/rs.3.rs-6667244/v1), 2025-05-28
Supplement: Supplementary file 1 [file 7adb3c92f9697848251acd73.docx]

**Carbon nanofiber-assisted molecularly imprinted electrochemical sensors for selective hypoxanthine detection from real samples**

Canan Armutcu1*, Sena Pişkin1, Erdoğan Özgür1,

Mustafa Karakaya3, M. Emin Çorman2, Lokman Uzun1

*1Hacettepe University, Faculty of Science, Department of Chemistry, Ankara, Türkiye*

*2University of Health Sciences, Gülhane Faculty of Pharmacy, Department of Biochemistry, Ankara, Türkiye*

*3Sinop University, Faculty of Engineering & Architecture, Department of Energy System, Sinop, Türkiye*

**S1. Results and discussion**

**S1. Quantum calculations for designing of MECs**

| 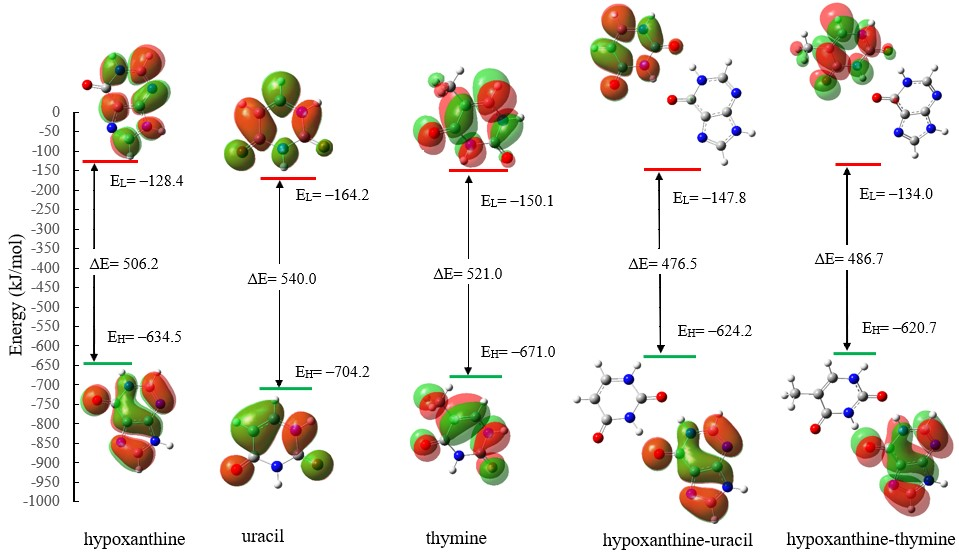 |
| --- |
| Figure S1. 3D plots and energy levels of the highest occupied and lowest unoccupied molecular orbitals in hypoxanthine-monomer interactions. |

| 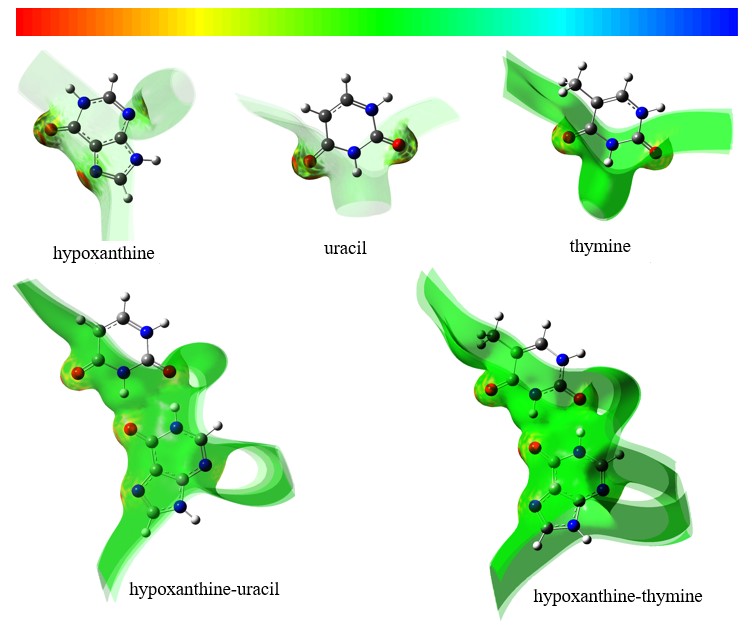 |
| --- |

Figure S2. Visuals mapped with ESP of the hypoxanthine-monomer interactions.
